# Supplementary material for: Simultaneous detection of tyrosine and uric acid in sweat using CoWO4@CNT with a hydrogel modified electrochemical biosensor
Source: Royal Society of Chemistry journal article supplement (doi:10.1039/d4ay01070a), 2024-01-01
Supplement: d4ay01070a1.pdf [file d4ay01070a1.pdf]

## Supplementary Information

### Simultaneous detection of tyrosine and uric acid in sweat by CoWO<sub>4</sub>@CNT with hydrogel modified electrochemical biosensor

Xin Zeng <sup>a†</sup>, Xuheng Li <sup>a\*†</sup>, Yong Zhang <sup>a</sup>, Cuncun Wang <sup>a</sup>, Yiyi Liu <sup>a</sup>, Changjun

Hou <sup>a, b\*</sup>, Danqun Huo <sup>a, b\*</sup>

---

<sup>a</sup> Key Laboratory for Biological Science and Technology of Ministry of Education, Bioengineering College of Chongqing University, Chongqing 400044, PR China

<sup>b</sup> Chongqing Key Laboratory of Bio-perception & Intelligent Information Processing, School of Microelectronics and Communication Engineering, Chongqing University, Chongqing, 400044, PR China

\* Corresponding author. Tel.: +86 23 6511 2673; fax: +86 23 6510 2507.

mail addresses: [houcj@cqu.edu.cn](mailto:houcj@cqu.edu.cn) (C. Hou); [huodq@cqu.edu.cn](mailto:huodq@cqu.edu.cn) (D. Huo)

† **equivalent to the same contribution.**

## **Materials and instruments**

### **Instruments**

The morphology and structure of the synthesized materials were analyzed using the FEI Quattro S (ESEM). The composition and chemical states of the materials were determined using the Thermo Fisher Scientific ESCALAB 250Xi multifunctional X-ray photoelectron spectroscopy (XPS). The electrochemical performance was evaluated using the CHI 660E electrochemical workstation (CH Instruments, Shanghai, China) in a three-electrode configuration through cyclic voltammetry (CV), chronoamperometry (i-t), and differential pulse voltammetry (DPV) methods.

### **Materials**

Uric acid (UA), tyrosine (Tyr) and were purchased from Solarbio (Beijing, China). Glucose (Glu), urea, sodium chloride (NaCl, 99%), potassium chloride (KCl, 99%), calcium chloride (CaCl<sub>2</sub>, 99%), methanol, acetone, and carboxylated multi-walled carbon nanotubes (CNT-COOH) were provided by Aladdin. Cobalt nitrate hexahydrate (Co(NO<sub>3</sub>)<sub>2</sub>·6H<sub>2</sub>O), sodium tungstate dihydrate (Na<sub>2</sub>WO<sub>4</sub>·2H<sub>2</sub>O) were obtained from Thermo Fisher Scientific (China). Phosphate buffered saline (PBS) was purchased from Beijing Dingguo Changsheng Biotechnology Co.

Table S1 Sweat absorption rate of different DA/DM Hydrogels

| DA/DM | Time (Min) |      |      |      |      |        | Sweat absorption rate at 40 minutes (%) |
|-------|------------|------|------|------|------|--------|-----------------------------------------|
|       | Weight (g) | 0    | 10   | 20   | 30   | 40     |                                         |
| 8     | 0.60       | 0.96 | 1.11 | 1.22 | 1.29 | 215.47 |                                         |
| 4     | 0.92       | 1.64 | 1.87 | 1.99 | 2.08 | 226.04 |                                         |
| 2     | 0.85       | 1.29 | 1.42 | 1.55 | 1.70 | 200.57 |                                         |
| 0     | 0.78       | 1.16 | 1.33 | 1.47 | 1.55 | 198.47 |                                         |

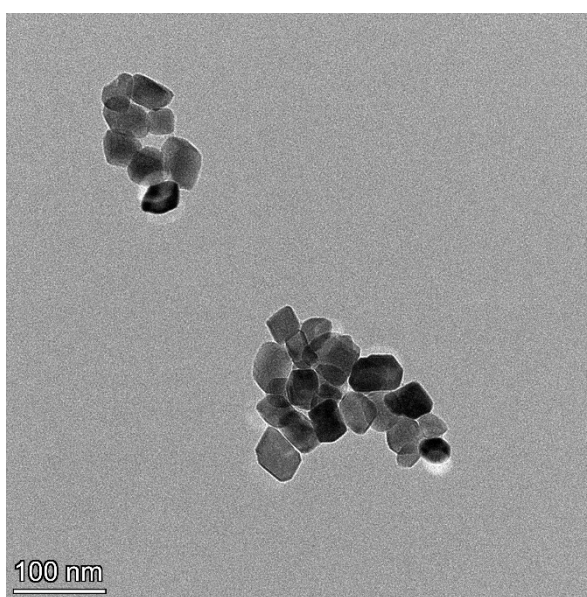

Figure S1 HR-TEM images of  $\text{CoWO}_4$  (bar: 100 nm)

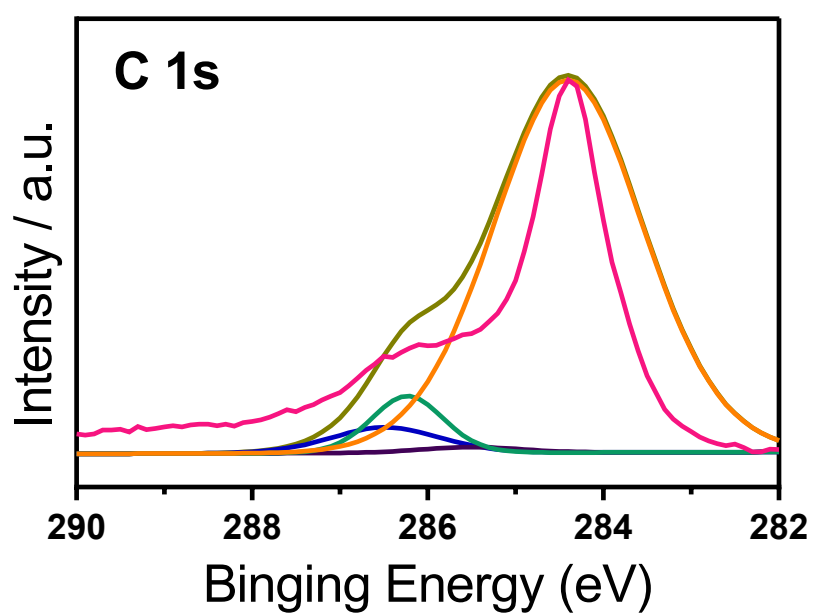

Figure S2 XPS spectra corresponding to C 1S.

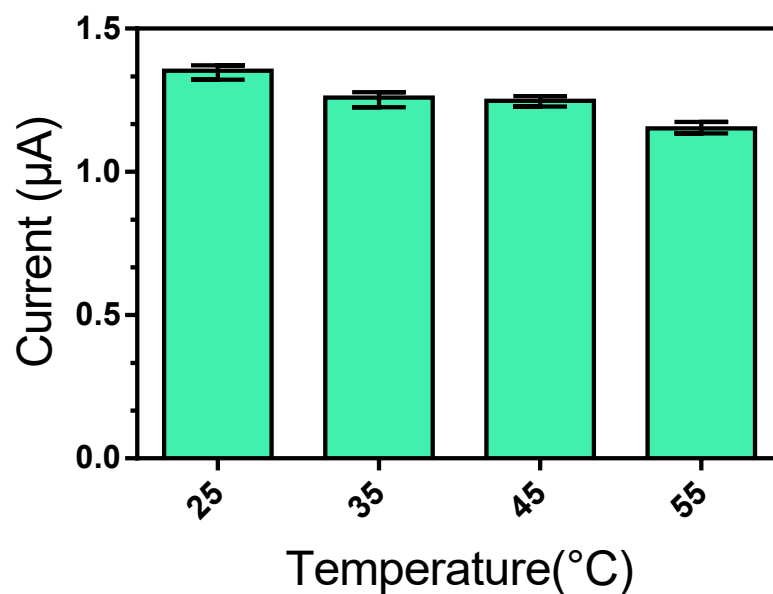

Figure S3 Current at different temperatures accordingly.

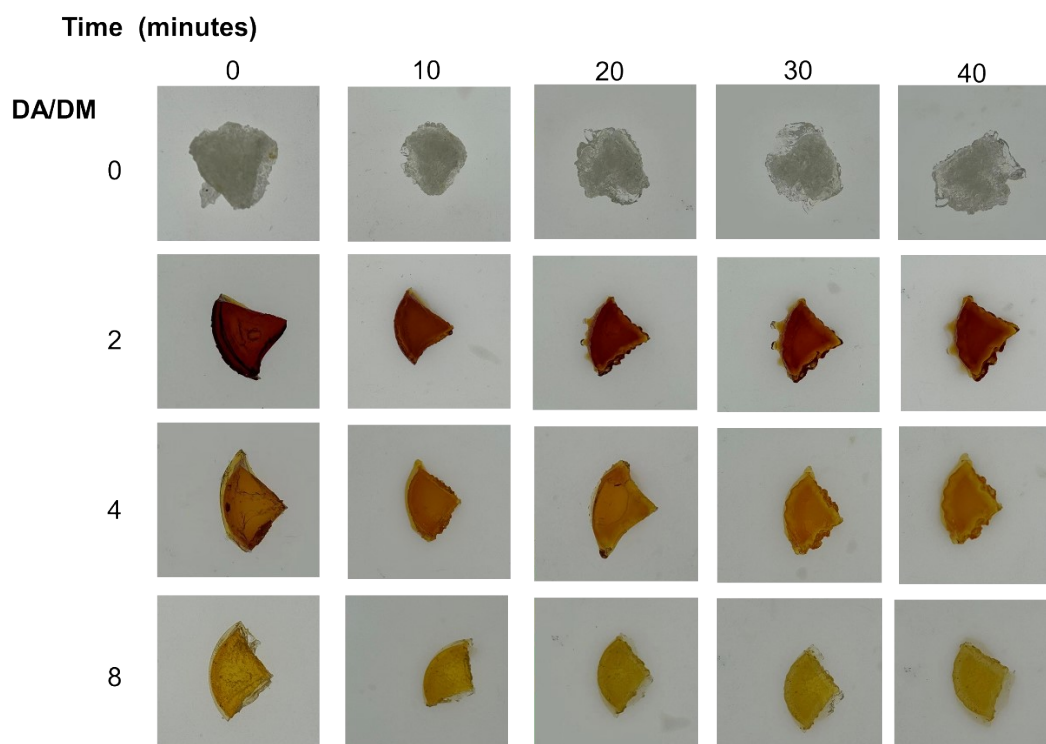

Figure S4 Swelling of different DA/DM hydrogels from 0 to 40 minutes of sweat absorption.
